# Supplementary material for: Synthesis of organic–inorganic hybrid nanocomposites modified by catalase-like catalytic sites for the controlling of kiwifruit bacterial canker
Source: Royal Society of Chemistry journal article supplement (doi:10.1039/d4ra02006e), 2024-01-01
Supplement: d4ra02006e1.pdf [file d4ra02006e1.pdf]

## Supplementary Information

### **Synthesis of Organic-Inorganic Hybrid Nanocomposites Modified by Catalase-like Catalytic Sites for the Controlling of Kiwifruit Bacterial Canker**

Zhenghao Ding, Qingqing Song , Guangdi Wang, Zhuojun Zhong, Guoyong Zhong, Hong Li, Yuexin Chen, Xiang Zhou, Liwei Liu\* and Song Yang\*

State Key Laboratory of Green Pesticide; Key Laboratory of Green Pesticide and Agricultural Bioengineering, Ministry of Education, Center for R&D of Fine Chemicals of Guizhou University, Guiyang, 550025, China.

\* Corresponding author: E-mail: [syang@gzu.edu.cn](mailto:syang@gzu.edu.cn), [jhzx.msm@gmail.com](mailto:jhzx.msm@gmail.com).

## Supplementary Experimental Section

### Characterizations

The morphology of the samples was observed by scanning electron microscopy (SEM; Nova NanoSEM<sup>TM</sup> 450, FEI, USA) and transmission electron microscopy (TEM; Talos F200C, FEI, USA), and elemental analysis was performed by using an energy dispersive spectroscopy (EDS, Oxford Instruments, X-MAXn65 T, U.K.). We also characterized the structure and composition of the samples by X-ray photoelectron spectroscopy (XPS, ESCALAB 250Xi, Thermo Scientific, USA). All electron spin resonance (ESR) measurements were carried out using a Bruker EMX ESR spectrometer (Billerica, MA) at ambient temperature. Fourier Transform infrared spectroscopy (FT-IR) were recorded in the range of 4000 – 400 cm<sup>-1</sup> with 32 scans at a resolution of 2 cm<sup>-1</sup> using FT-IR spectrometer ((Nicolet IS50, ThermoFisher, USA) at room temperature. The zeta potential and size distribution of the samples were determined through a laser diffraction particle size analyzer (DLS, Nano Brook Omni, USA).

### Peroxidase (POD)-like activity of nanocomposites.

Steady-state kinetics assays were conducted at 25 °C in 200 µL of phosphate buffer saline solution (PBS, pH 4.5) with 20 µL of ZnO@PDA-Mn nanocomposites solution (final concentration 10 µg/mL) as catalyst in the presence of H<sub>2</sub>O<sub>2</sub> and 3, 3', 5, 5'-tetramethylbenzidine (TMB). 1) H<sub>2</sub>O<sub>2</sub> as the substrate: 5 µL of 0.0416 M TMB and different amounts of H<sub>2</sub>O<sub>2</sub> (5 µL of 0.12%, 5 µL of 0.24%, 5 µL of 0.47%, 5 µL of 0.94%, 5 µL of 1.88%, 5 µL of 3.75%, 5 µL of 7.5%, 5 µL of 15% H<sub>2</sub>O<sub>2</sub>) were added to the reaction system containing ZnO@PDA-Mn nanocomposites, with change in absorbance recorded at 652 nm with time at 25°C. 2) TMB as the substrate: 5µL of 15% H<sub>2</sub>O<sub>2</sub> and different amounts of TMB (5 µL of 0.0052 M, 5 µL of 0.0104 M, 5µL of 0.0208 M, 5, 10, 15, 20, 25 µL of 0.0416M of TMB solution) were added to the reaction system containing ZnO@PDA-Mn nanocomposite, with the change in

absorbance recorded at 652 nm with time at 25 °C. For comparison, the enzyme-like activities of PDA, ZnO NPs and ZnO@PDA nanocomposites were also measured.

The apparent kinetic parameters were calculated based on Michaelis equation (10.1016/j.biomaterials.2010.11.004).

$$v=V_{\max} \times [S]/(K_m+[S])$$

$v$  is the initial velocity,  $V_{\max}$  is the maximal reaction velocity,  $[S]$  is the concentration of substrate and  $K_m$  is the Michaelis constant.

### **Superoxide dismutase (SOD)-like activity of nanocomposites.**

The SOD-like activity of the ZnO@PDA-Mn nanocomposites was evaluated at room temperature using a commercial colorimetric SOD assay kit from Solarbio, in accordance with the manufacturer's instructions. The SOD-like activity of ZnO@PDA-Mn (10 µg/mL and 15 µg/mL) was expressed as the percentage inhibition of the competitive WST-1 reaction with superoxide by natural SOD enzymes.

### **Determination of Hydroxy radical ( $\cdot$ OH).**

$\cdot$ OH measurement. Glass capillary tubes containing ZnO@PDA-Mn (0.1 mg/mL, 50 µL), H<sub>2</sub>O<sub>2</sub> (0.001 M, 50 µL), 5-tert-butoxycarbonyl 5-methyl-1-pyrroline-N-oxide (BMPO, 10mM), and PBS (pH 4.5) were inserted into the electron spin resonance (ESR) cavity to record  $\cdot$ OH signals at selected times.

### **The interaction between nanoparticles and bacterial surfaces was observed by TEM.**

Approximately 5 mL of the bacterial suspension ( $1 \times 10^9$  CFU/mL) was centrifuged at 6000 rpm at 4 °C for 1.5 min. After discarding the supernatant, the bacteria were washed with 1 mL PBS thrice to remove the medium; finally, 1 mL PBS was added to resuspend the bacterial solution ( $5 \times 10^9$  CFU/mL). In addition, 100 µL of the bacterial solution was mixed with 5 mL of the samples solution and incubated at 28 °C for 4 h. Thereafter, 20 µL aliquots were dropped on a carbon film coated with a copper grid (200 mesh), dried with filter paper for 1 min, and stained with uranium acetate (1%)

for 10 s. The excess uranium acetate was absorbed using a filter paper, and the samples were dried at room temperature, following which they were observed and appropriate images recorded using TEM.

### **Live/dead cell staining**

Bacterial suspensions treated by H<sub>2</sub>O<sub>2</sub>, ZnO, ZnO@PDA-Mn and ZnO@PDA-Mn +H<sub>2</sub>O<sub>2</sub> for 4 h. Then the bacterial suspensions were collected by centrifugation at 4000 r/min for 5 min. The cells were then stained with SYTO 9 and propidium iodide (PI) for 30 min and visualized via fluorescence microscopy (FluoroMax<sup>®</sup>-4P, HORIBA, France).

### **Zone of inhibition (ZOI) assay**

ZnO@PDA-Mn were studied for the antibacterial efficacy against *Psa* using disk diffusion technique commonly known as Kirby Baurer method. This is a qualitative technique to test the ability of a material to inhibit microbial growth by measuring ZOI. Overnight bacterial culture was grown at 37 °C and its cell density was adjusted to 10<sup>8</sup> CFU/mL (i.e. Optical density of 0.1 at 600 nm). 0.1 mL of bacterial culture was spread onto sterile agar plates. Plates were allowed to dried followed by placing 6 mm sterile disc soaked for 10 min in Zn-Th, ZnO and ZnO@PDA-Mn concentration 3.13 µg/mL. Post incubation at 37 °C for 48 h, ZOI around the disc was measured.

### **Kiwifruit tissue section observation experiment**

After measuring the length of kiwifruit lesions, the kiwifruit tissues treated with different samples were sliced. The tissue sections were then immersed in 2.5% glutaraldehyde (Sigma-Aldrich, USA) and fixed for 10 hours at 4 °C under dark conditions. Subsequently, the tissue sections underwent dehydration with a series of ethanol concentrations (30%, 50%, 70%, 90%, and 100%) for 10 minutes each. Finally, the dried tissue sections were sputter-coated with gold for imaging using scanning electron microscopy.

**Table S1.** Comparison of Michaelis-Menton constants ( $K_m$ ) and maximum reaction rates ( $V_{max}$ ) of reported catalase-like nanozymes.

| Catalysts                        | $K_m$ (mM) | $V_{max}$ (mg/(L·min)) | Ref.                               |
|----------------------------------|------------|------------------------|------------------------------------|
| ZnO@PDA-Mn                       | 116.3      | 6.03                   | This work                          |
| Catalase                         | 249.4      | 5.76                   | 10.1016/j.cej.2020.124249          |
| Fe <sup>3+</sup> /nucleotide CPs | 112.2      | 4.61                   | 10.1016/j.cej.2020.124249          |
| RuO <sub>2</sub> NP              | 400.0      | /                      | 10.1002/chem.201200643             |
| Pt-Ft                            | 420.6      | 1.6 × 10 <sup>3</sup>  | 10.1016/j.biomaterials.2010.11.004 |
| Au-Si-ACD                        | 117.0      | 0.23                   | 10.1002/smll.201603051             |
| N-PCNSs-3                        | 66.3       | 1.03                   | 10.1038/s41467-017-02317-2         |
| IrNCs                            | 132.0      | /                      | 10.1016/j.biomaterials.2018.07.049 |
| CN                               | 393.3      | 4.76                   | 10.1021/acs.nanolett.9b01333       |
| Au <sub>24</sub> Ag <sub>1</sub> | 222.4      | 2.21                   | 10.1021/acs.nanolett.0c05148       |
| <i>pero</i> -nanozysome          | 90.0       | 4.67                   | 10.1002/adfm.202007130             |
| IrO <sub>x</sub> NPs             | 188.0      | 10.82                  | 10.1002/anie.201916142             |

**Table S2. Abbreviations**

| <b>Abbreviation</b> | <b>Full name</b>                                  |
|---------------------|---------------------------------------------------|
| <i>Xac</i>          | <i>Xanthomonas axonopodis</i> pv. <i>citr</i>     |
| <i>Psa</i>          | <i>Pseudomonas syringae</i> pv. <i>actinidiae</i> |
| OD                  | Optical density                                   |
| CFU                 | Colony Forming Unit                               |
| POD                 | Peroxidase                                        |
| CAT                 | Catalase                                          |
| SOD                 | Superoxide dismutase                              |
| PBS                 | phosphate buffer saline solution                  |
| h                   | Hour                                              |
| TMB                 | 3,3',5,5'-Tetramethylbenzidine                    |
| min                 | Minute                                            |
| TEM                 | Transmission electron microscopy                  |
| SEM                 | Scanning electron microscopy                      |
| FT-IR               | Fourier Transform infrared spectroscopy           |
| XPS                 | X-Ray Photoelectron Spectroscopy                  |
| XRD                 | X-Ray Diffraction                                 |
| DLS                 | Dynamic light scattering                          |

|       |                                |
|-------|--------------------------------|
| EDS   | Energy dispersive spectroscopy |
| ROS   | Reactive Oxygen Species        |
| PI    | Propidium iodide               |
| Zn-Th | Zinc Thiozole                  |
| PDA   | Polydopamine                   |

---

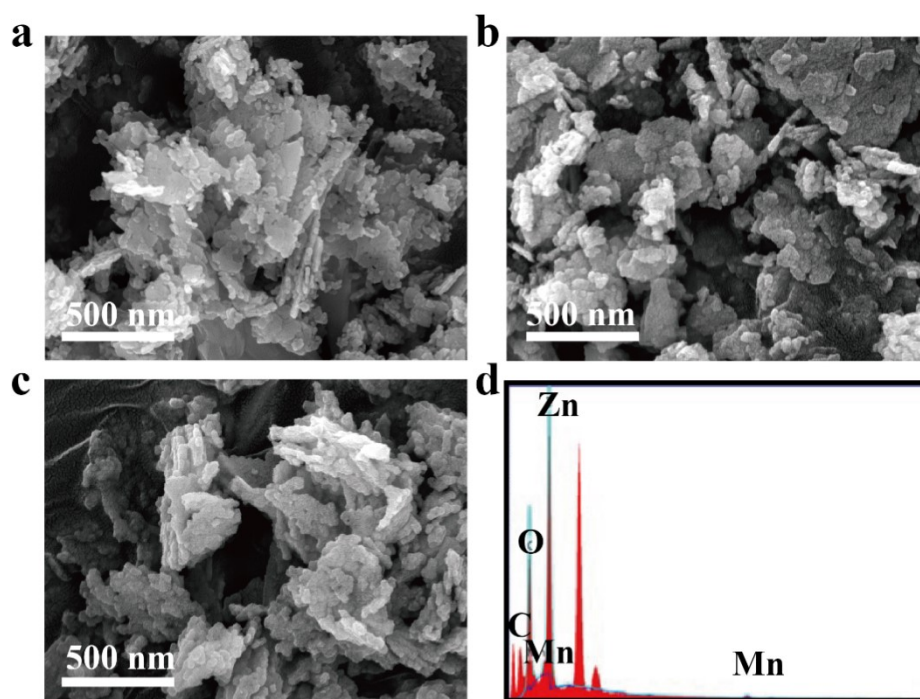

**Figure S1.** SEM and EDS characterization of (a)ZnO, (b)ZnO@PDA and (c,d)ZnO@PDA-Mn.

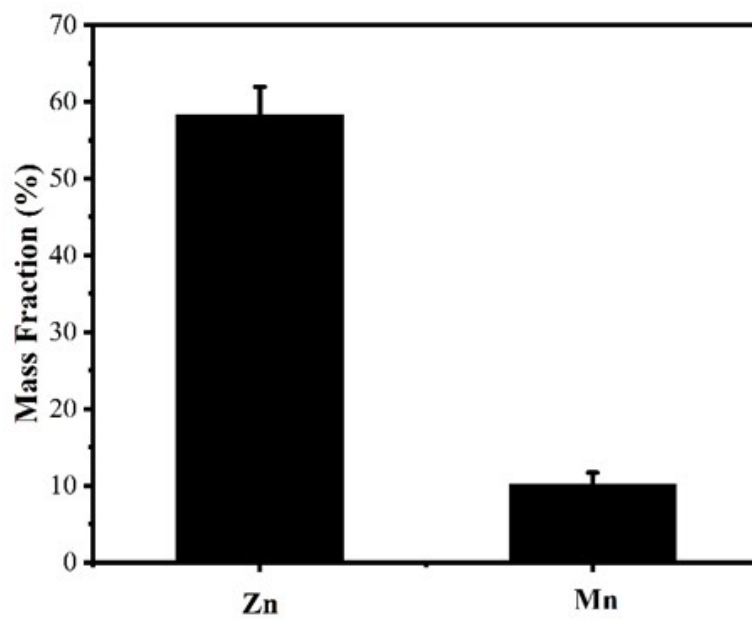

**Figure S2.** The Mass Fraction of Mn and Zn in ZnO@PDA-Mn.

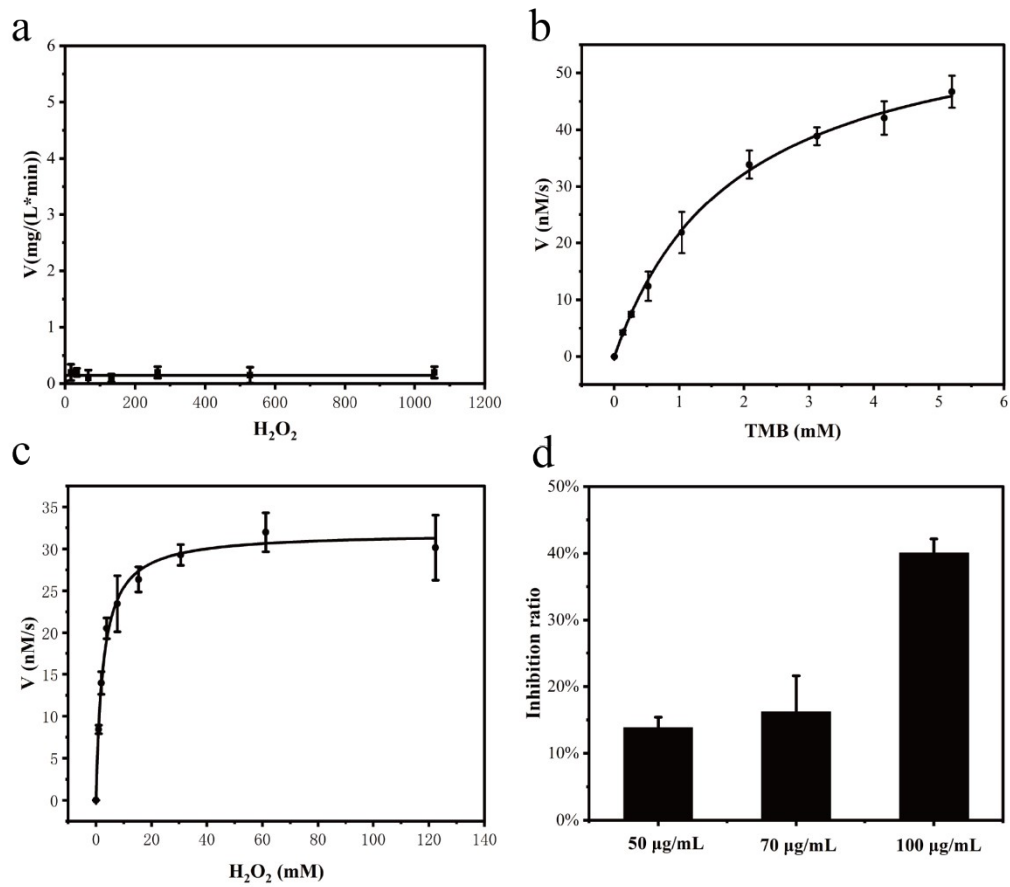



**Figure S3.** (a) Steady-state kinetics assay of CAT-like activity of PDA with varied  $\text{H}_2\text{O}_2$ . (b) Evaluation of the steady-state kinetics assay for the POD-like activity of PDA using varying concentrations of TMB. (c) Assessment of the steady-state kinetics assay for the POD-like activity of PDA using varying concentrations of  $\text{H}_2\text{O}_2$ . (d) Detection of SOD-like activity of PDA through WST-1 assay.

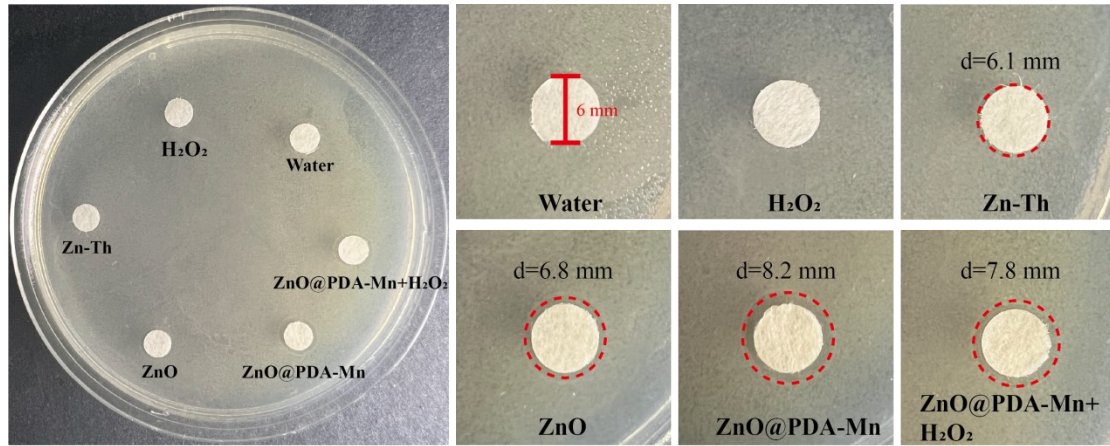

**Figure S4.** zone of inhibition assay.

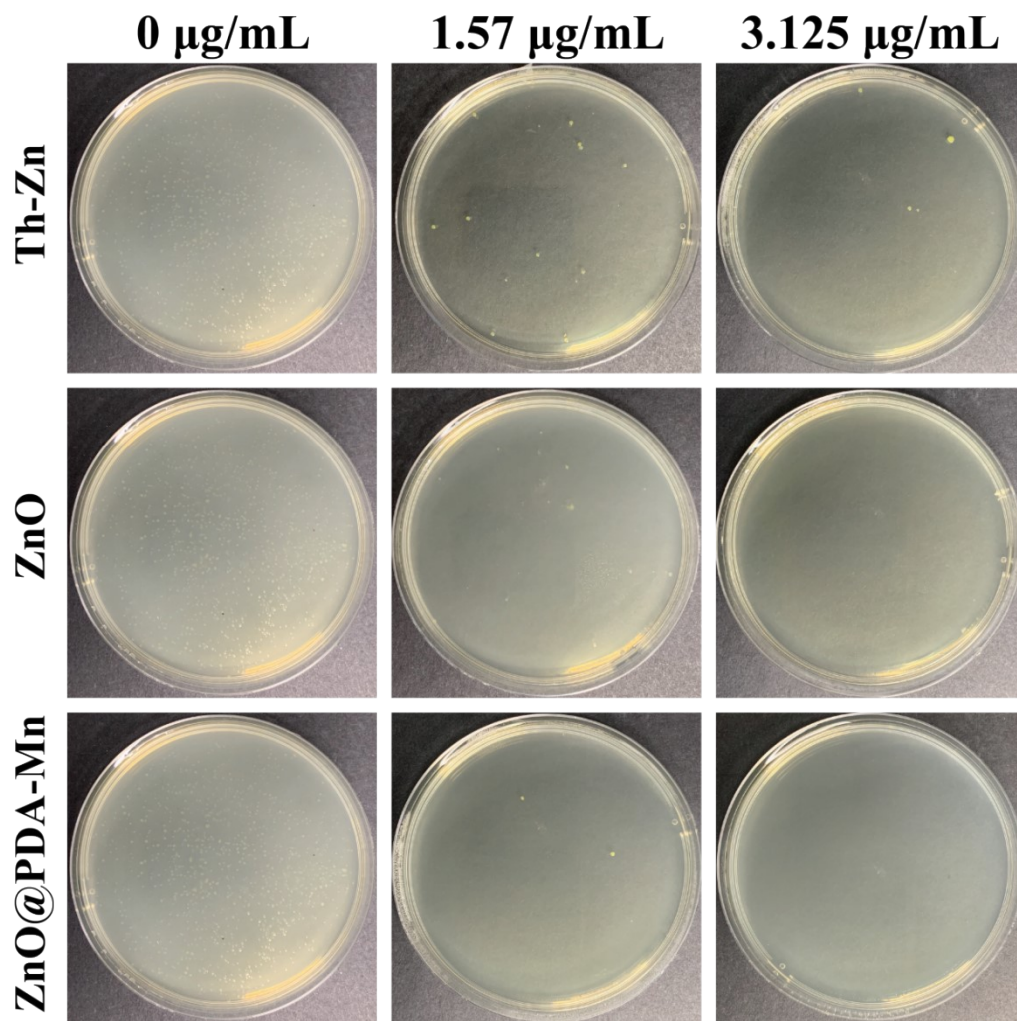

**Figure S5.** Representative colony formation of *Xanthomonas axonopodis* pv. *citr* (*Xac*) bacteria in different treatment groups.
